# Supplementary material
Source: PubMed Central journal article supplement (PMC5564448)
Supplement: NIHMS883271-supplement-Supplementary_File_1.pdf [file NIHMS883271-supplement-Supplementary_File_1.pdf]

# **Evaluation of Tumor Infiltrating Lymphocytes (TILs) in Invasive Breast Carcinoma**

Guidelines for TILs assessment from the “International  
Immuno-Oncology Biomarker Working Group”

Authors: Carsten Denkert<sup>1</sup>, Roberto Salgado<sup>2</sup> and Sandra Demaria<sup>3</sup>

1- Charité-University Hospital, Germany . 2-Institut Jules Bordet and TCRU, GZA, Belgium.

3-New York University Medical School, Perlmutter Cancer Center, USA.

Reproduced from Salgado et al 2015, with permission from Oxford University Press on behalf of the European Society for Medical Oncology.

# Aim of this tutorial

- To provide a guideline to pathologists for the standardized evaluation of tumor-infiltrating lymphocytes based on H&E slides of core biopsies or tumor resections.
- Please consult the manuscript for more specific details.

# Step 1: Define area for TILs evaluation

- Only TILs within the borders of the invasive tumors are evaluated
- The invasive edge is included in the evaluation, but not reported separately
- Immune infiltrates outside of the tumor borders, e.g. in adjacent normal tissue or DCIS are not included

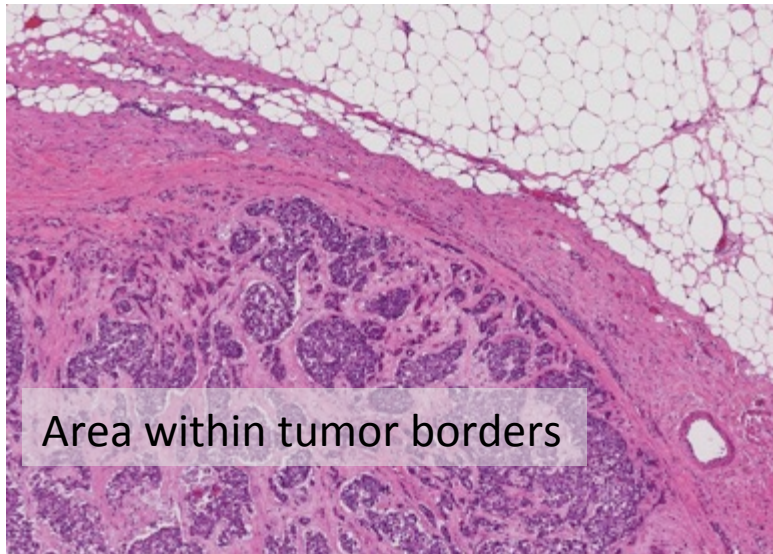

Example 1

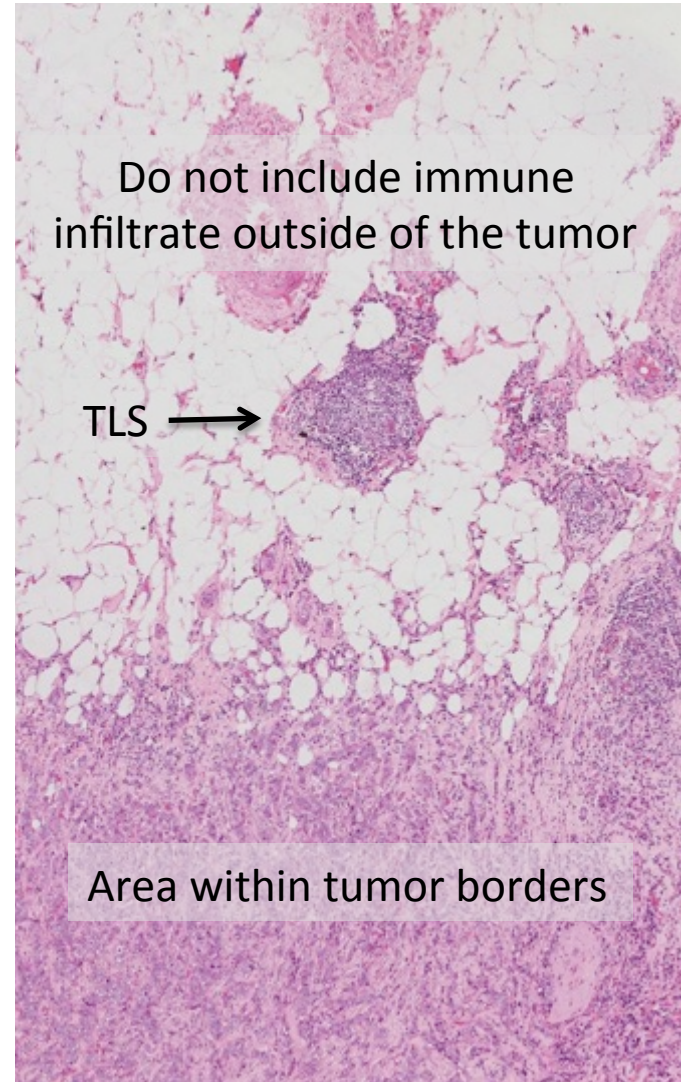

Example 2

# Step 1: Define area for TILs evaluation

- Large areas of central necrosis or fibrosis are not included in the evaluation

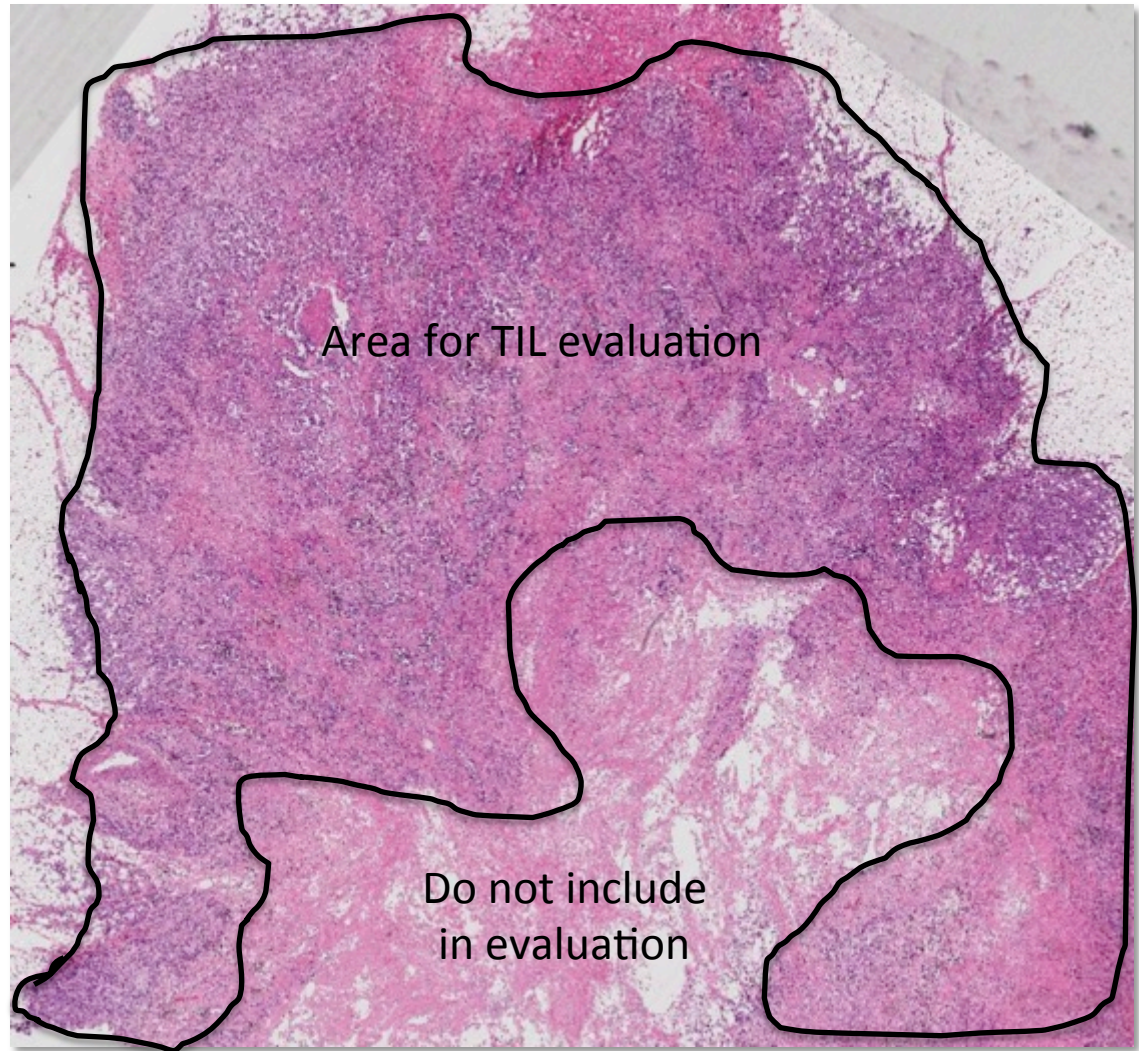

Example 3



## Step 2: Focus on stromal TILs

- In the diagnostic setting, only stromal TILs are relevant

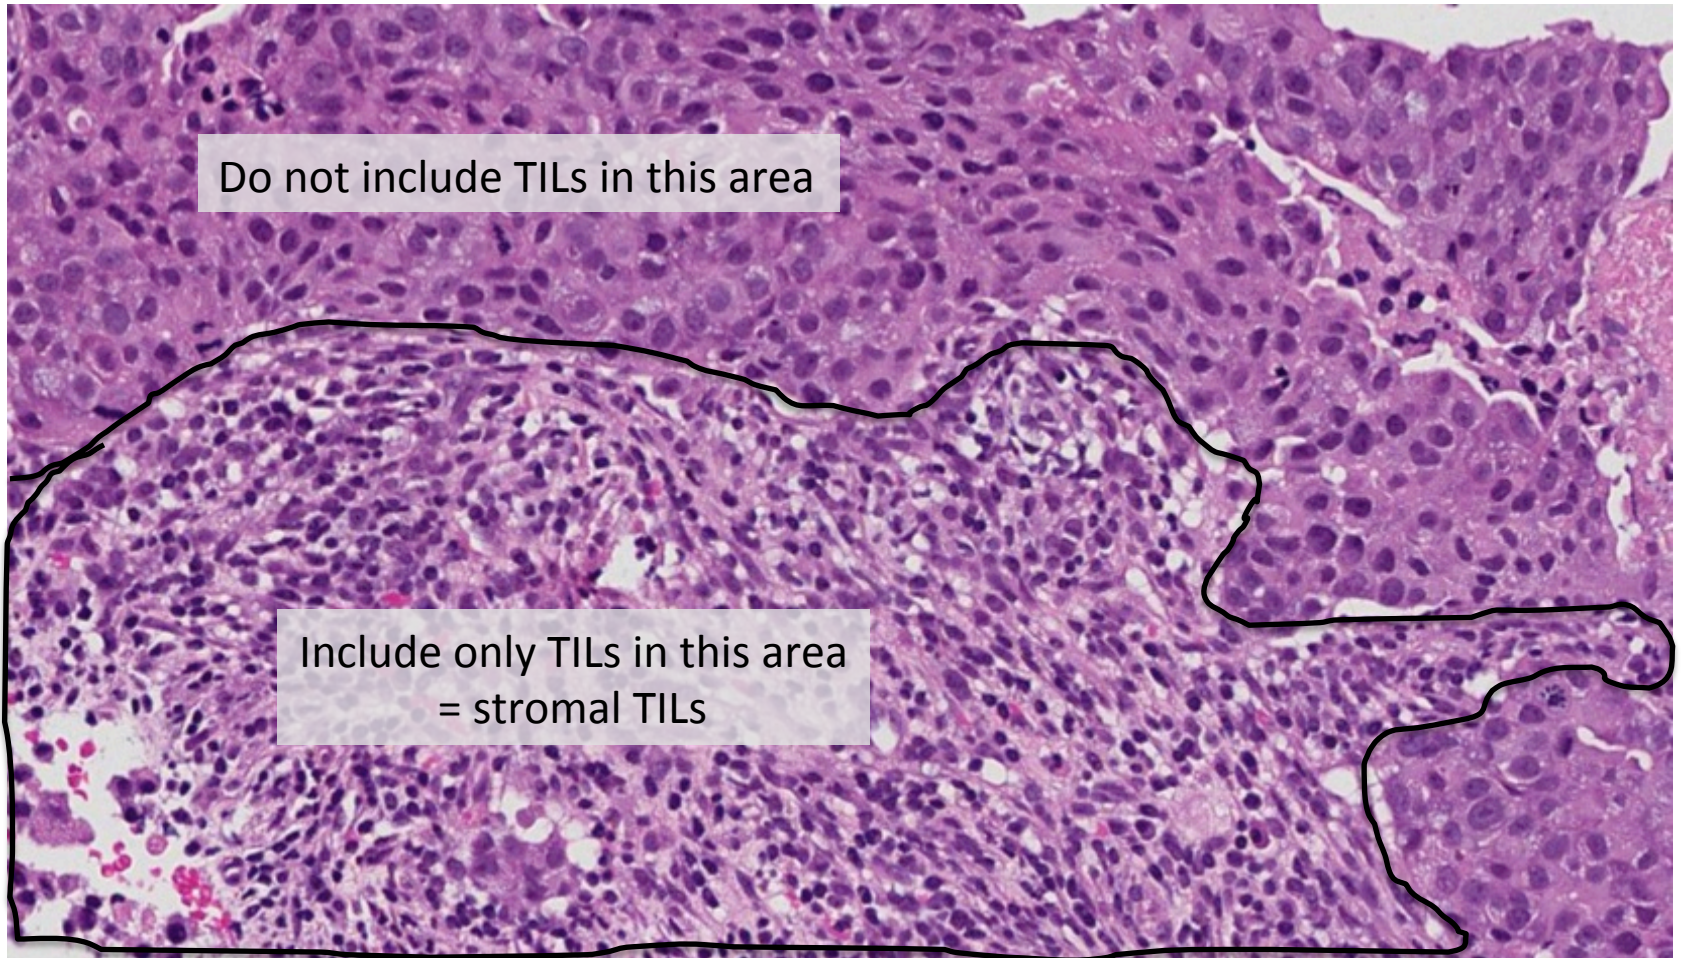

Example 4



## Step 2: Focus on stromal TILs

- In the diagnostic setting, only stromal TILs are relevant

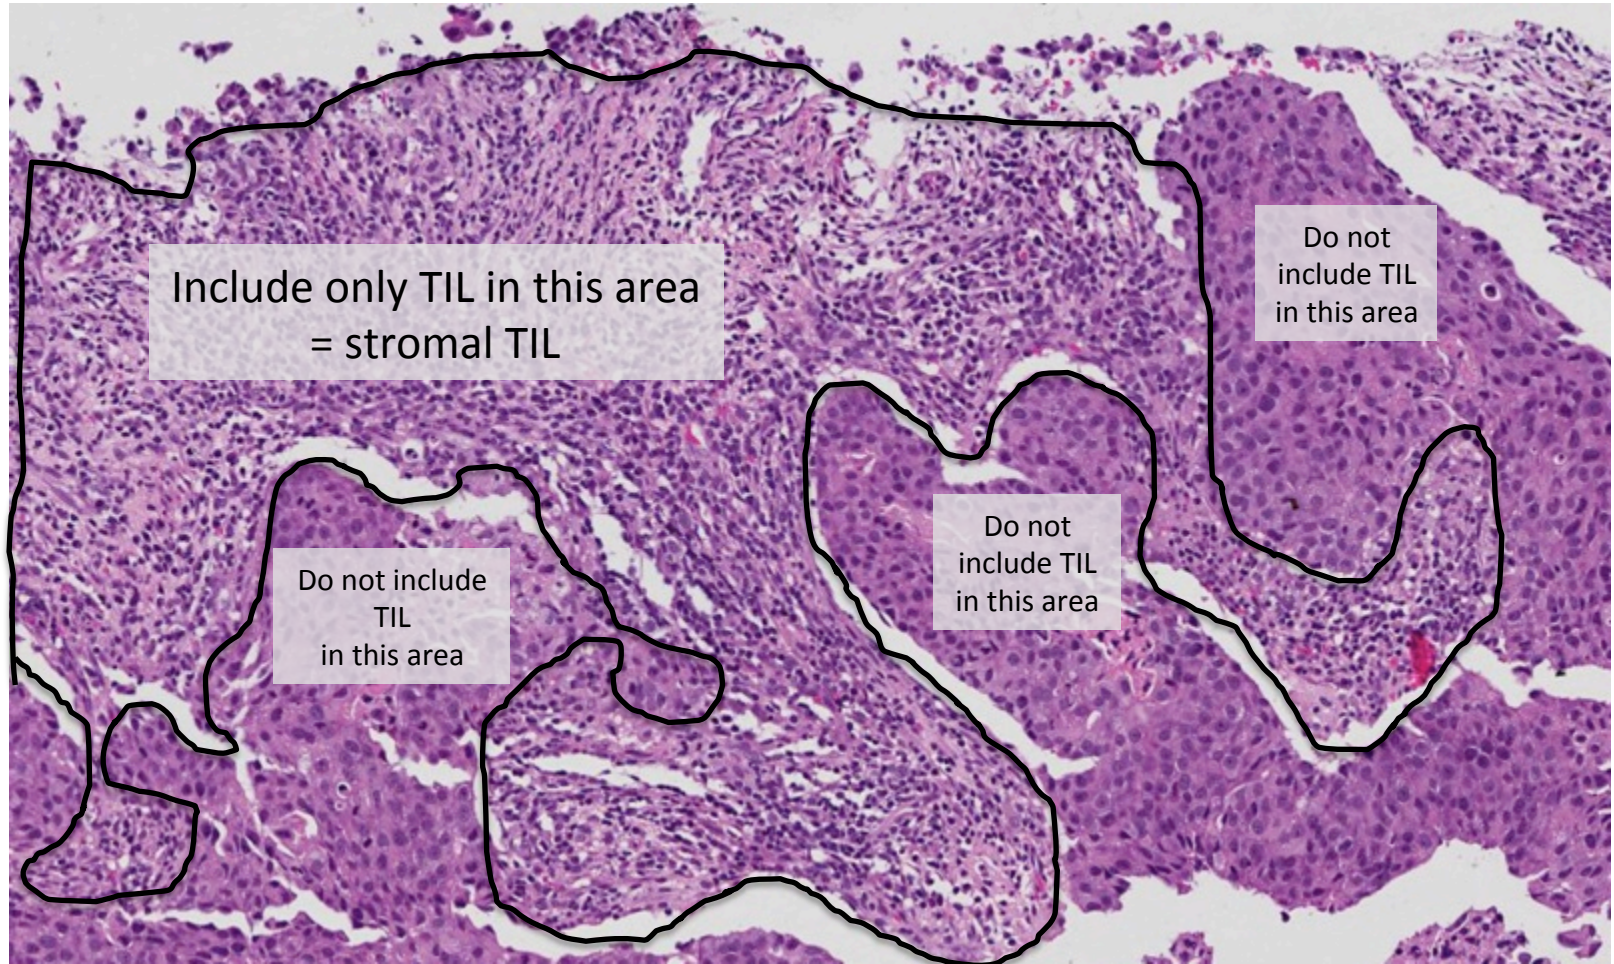

Example 5



## Step 2: Scan tumor at low magnification – focus on the tumor stroma

- Stroma contains predominantly collagenous tissue, few round cells
- Stroma contains predominantly round cell infiltrate, collagenous tissue difficult to recognize

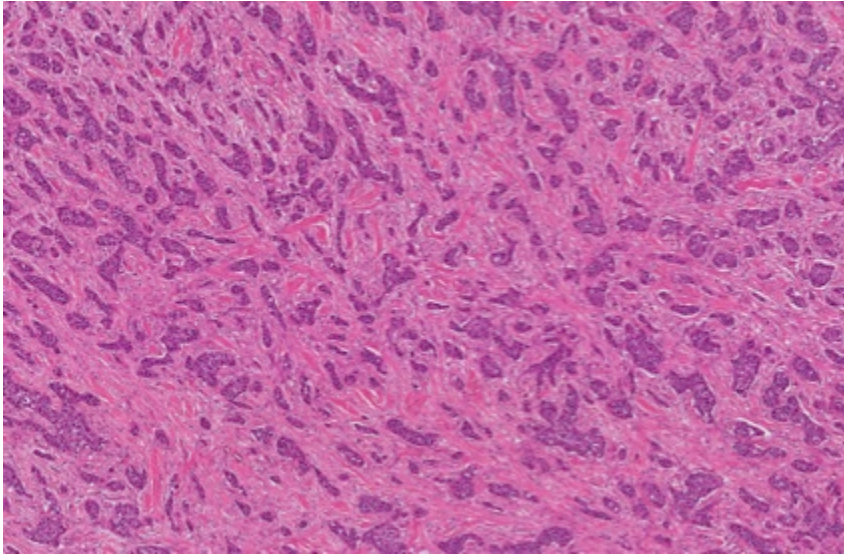

Example 6

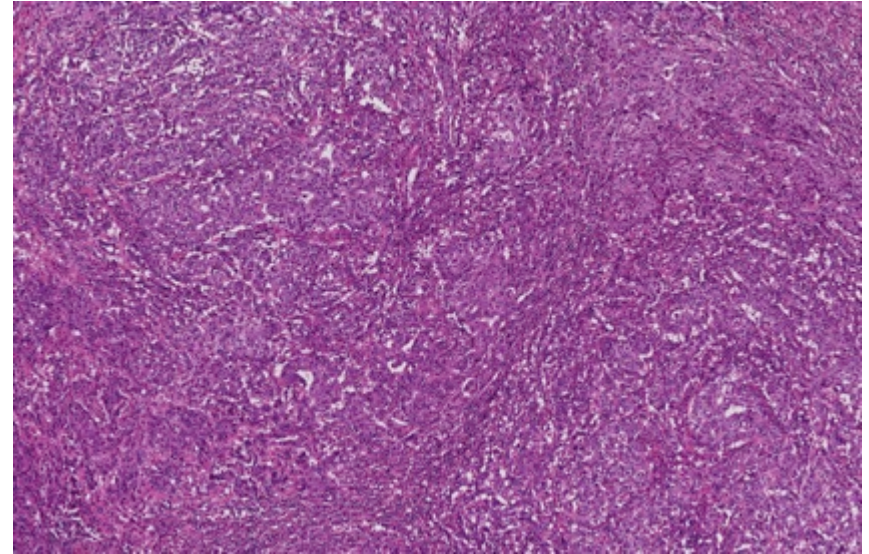

Example 7

## Step 2: Scan tumor at low magnification – focus on the tumor stroma

- Stroma contains predominantly collagenous tissue, few round cells
- Stroma contains predominantly round cell infiltrate, collagenous tissue difficult to recognize

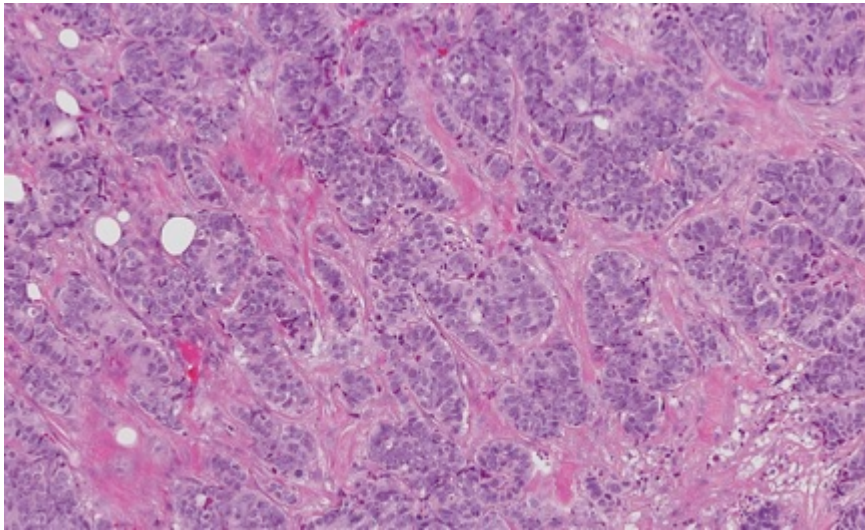

Example 8

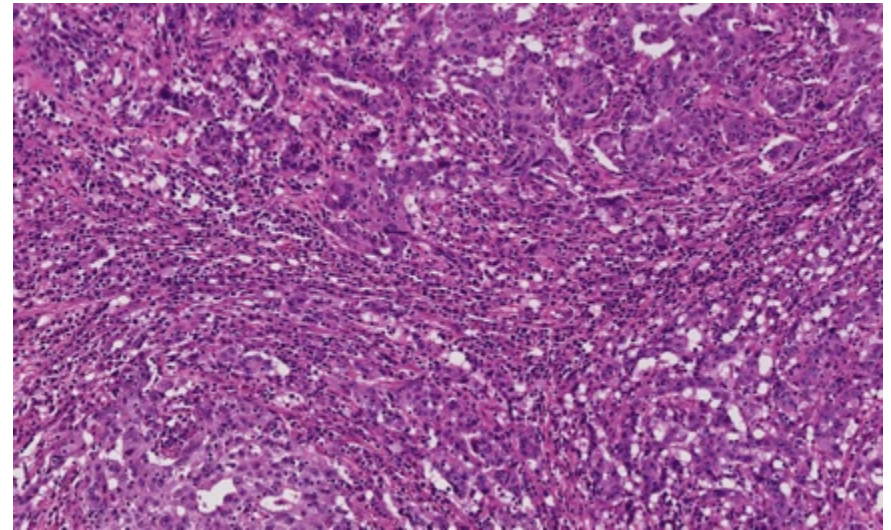

Example 9



## Step 2: Scan tumor at low magnification – focus on the tumor stroma

- Stroma contains predominantly collagenous tissue, few round cells
- Stroma contains predominantly round cell infiltrate, collagenous tissue difficult to recognize

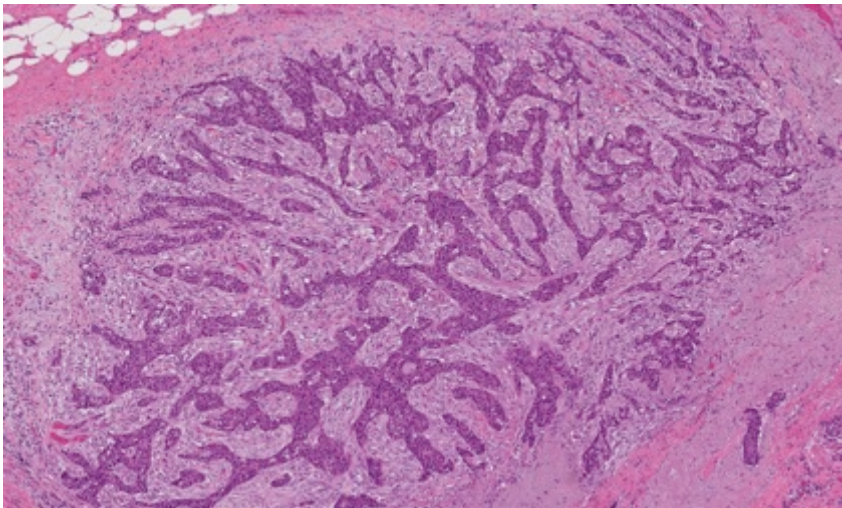

Example 10

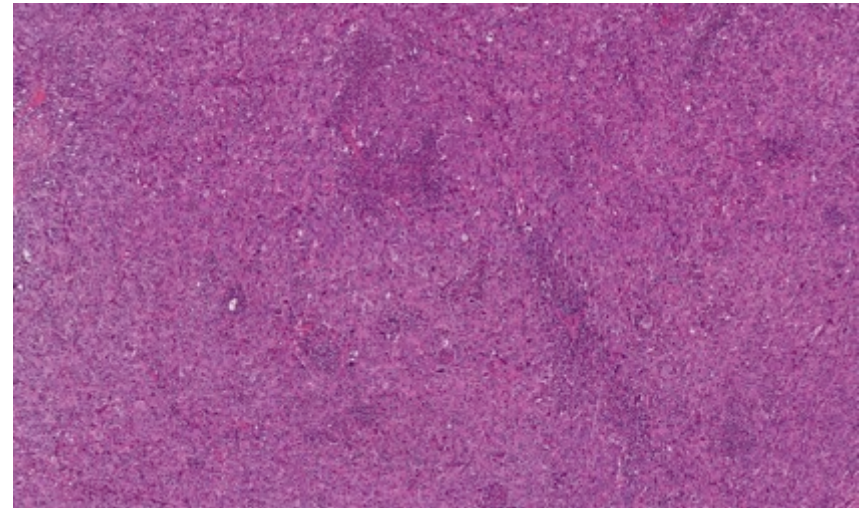

Example 11

## Step 3: Determine type of inflammatory infiltrate

- Include only mononuclear infiltrate (lymphocytes & plasma cells)
- Do not include granulocytic infiltrate in areas of tumor necrosis

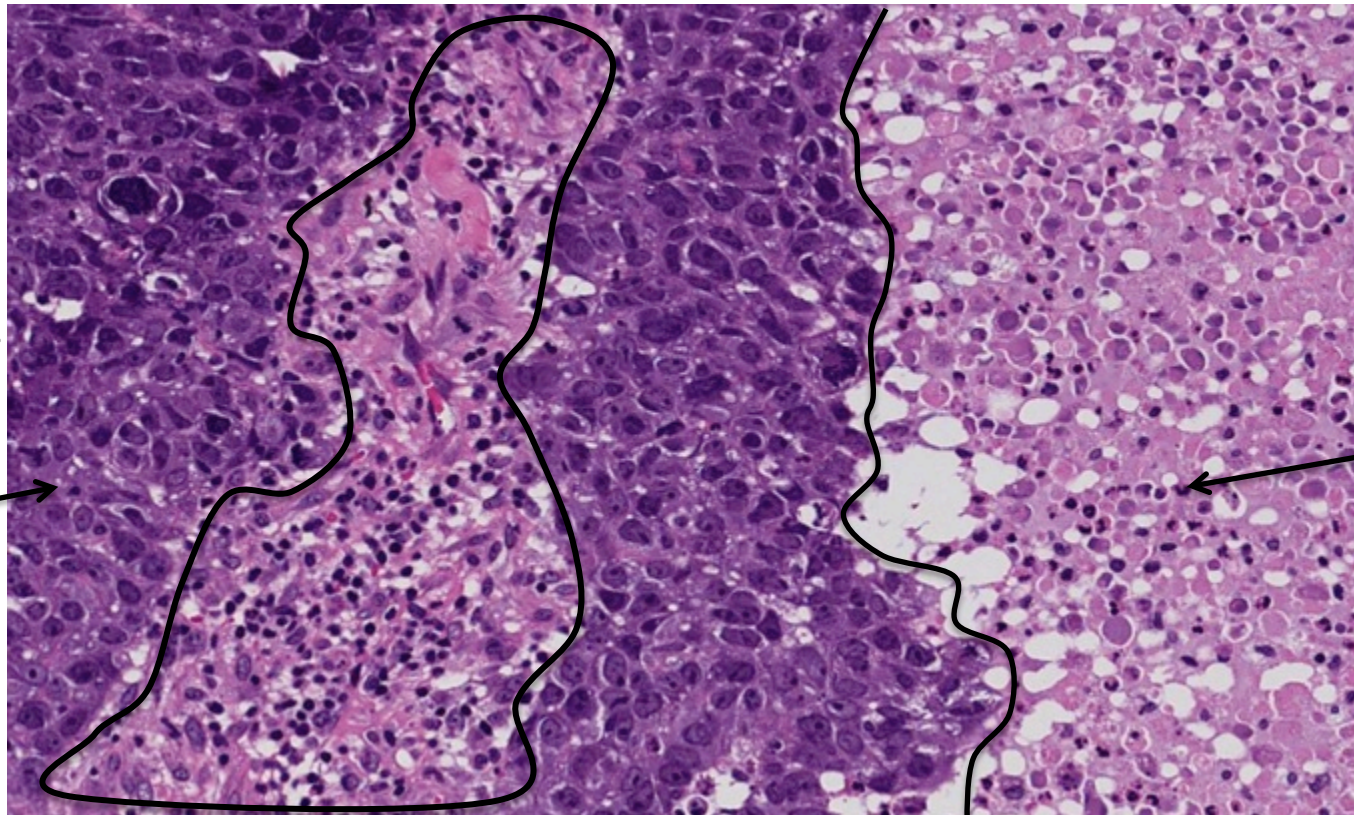

Example 12



## Step 3: Determine type of inflammatory infiltrate

- Include only mononuclear infiltrate (lymphocytes & plasma cells)
- Do not include granulocytic infiltrate in areas of tumor necrosis

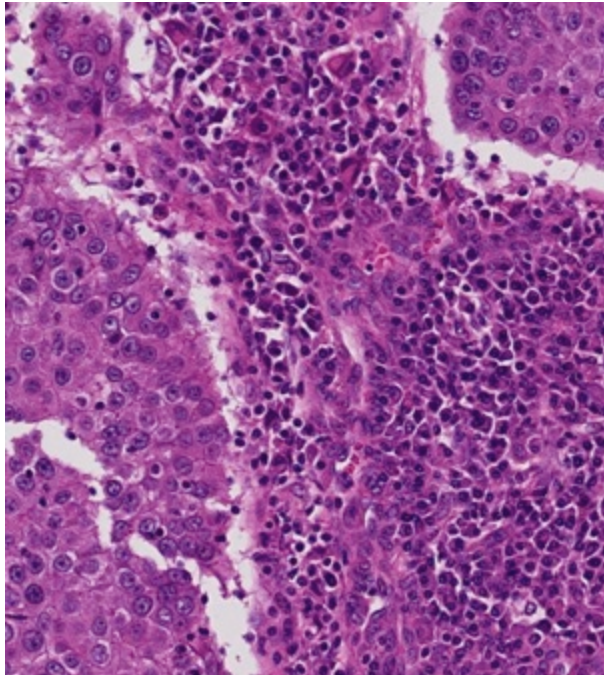

Example 13

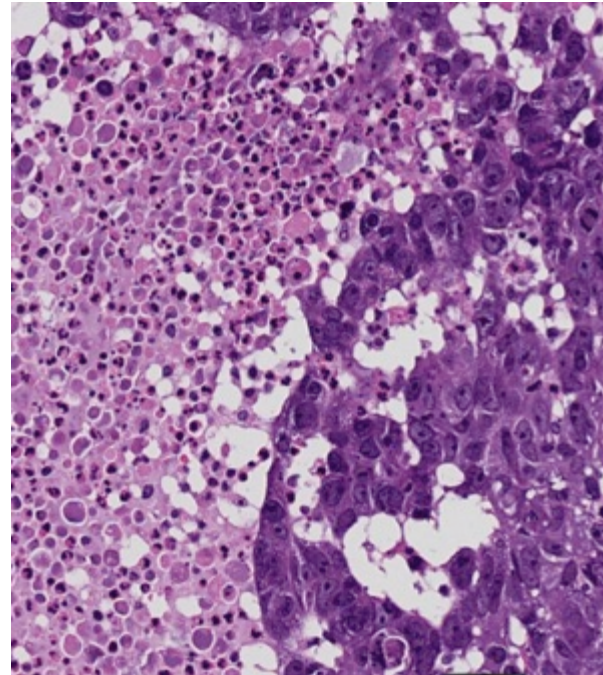

Example 14

# Step 4: As a first approach, include tumor in one of three groups based on low magnification and assess % stromal TILs (continue with Step 5 for percentage)

Group A: tumor with no/  
minimal immune cells

Group B: tumor with  
intermediate /  
heterogeneous infiltrate

Group C: tumor with high  
immune infiltrate

0-10% stromal TILs

10-40% stromal TILs

40-90% stromal TILs

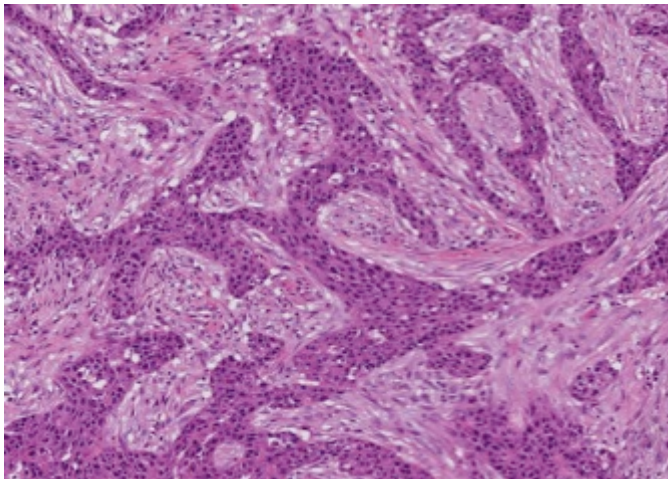

Example 15

For this  
intermediate  
group evaluate  
different areas  
at higher  
magnification.

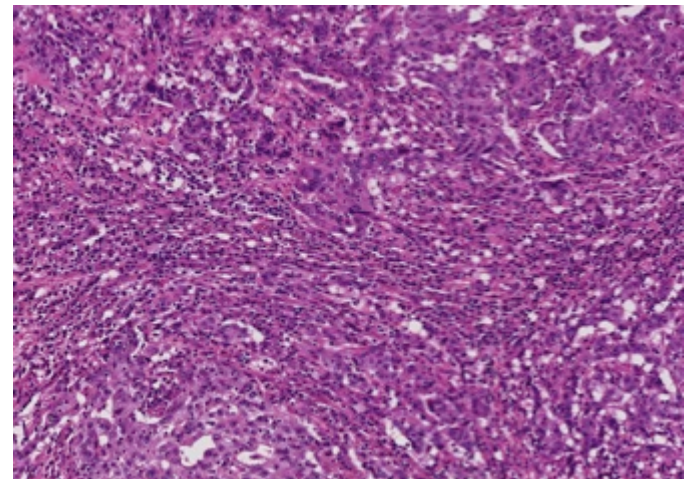

Example 16

The denominator used to determine the % stromal TILs is the area of stromal tissue (i.e. area occupied by mononuclear inflammatory cells over total intratumoral stromal area), not the number of stromal cells (i.e. fraction of total stromal nuclei that represent mononuclear inflammatory cell nuclei)



## Step 5: Report percentage of stromal lymphocytes

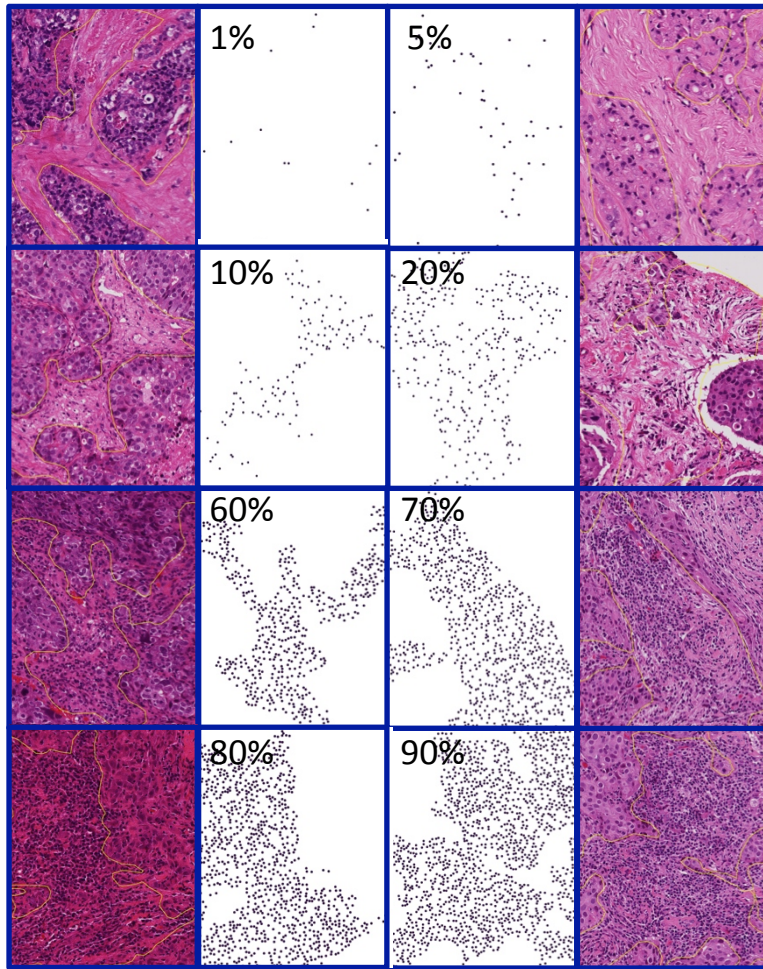

- Report the average of the stromal area, do not focus on hot spots.
- For intermediate group evaluate different areas at higher magnification.
- Please note that lymphocytes do not form solid aggregates, therefore even with 90-100% stromal TILs there will still be some space between the individual lymphocytes.
