# Supplementary material
Source: PubMed Central journal article supplement (PMC5564448)

# TILs in Invasive Breast Carcinoma: Reference Scoring Sheet

Reproduced from Salgado et al 2015 with permission from Oxford University Press  
on behalf of the European Society for Medical Oncology.

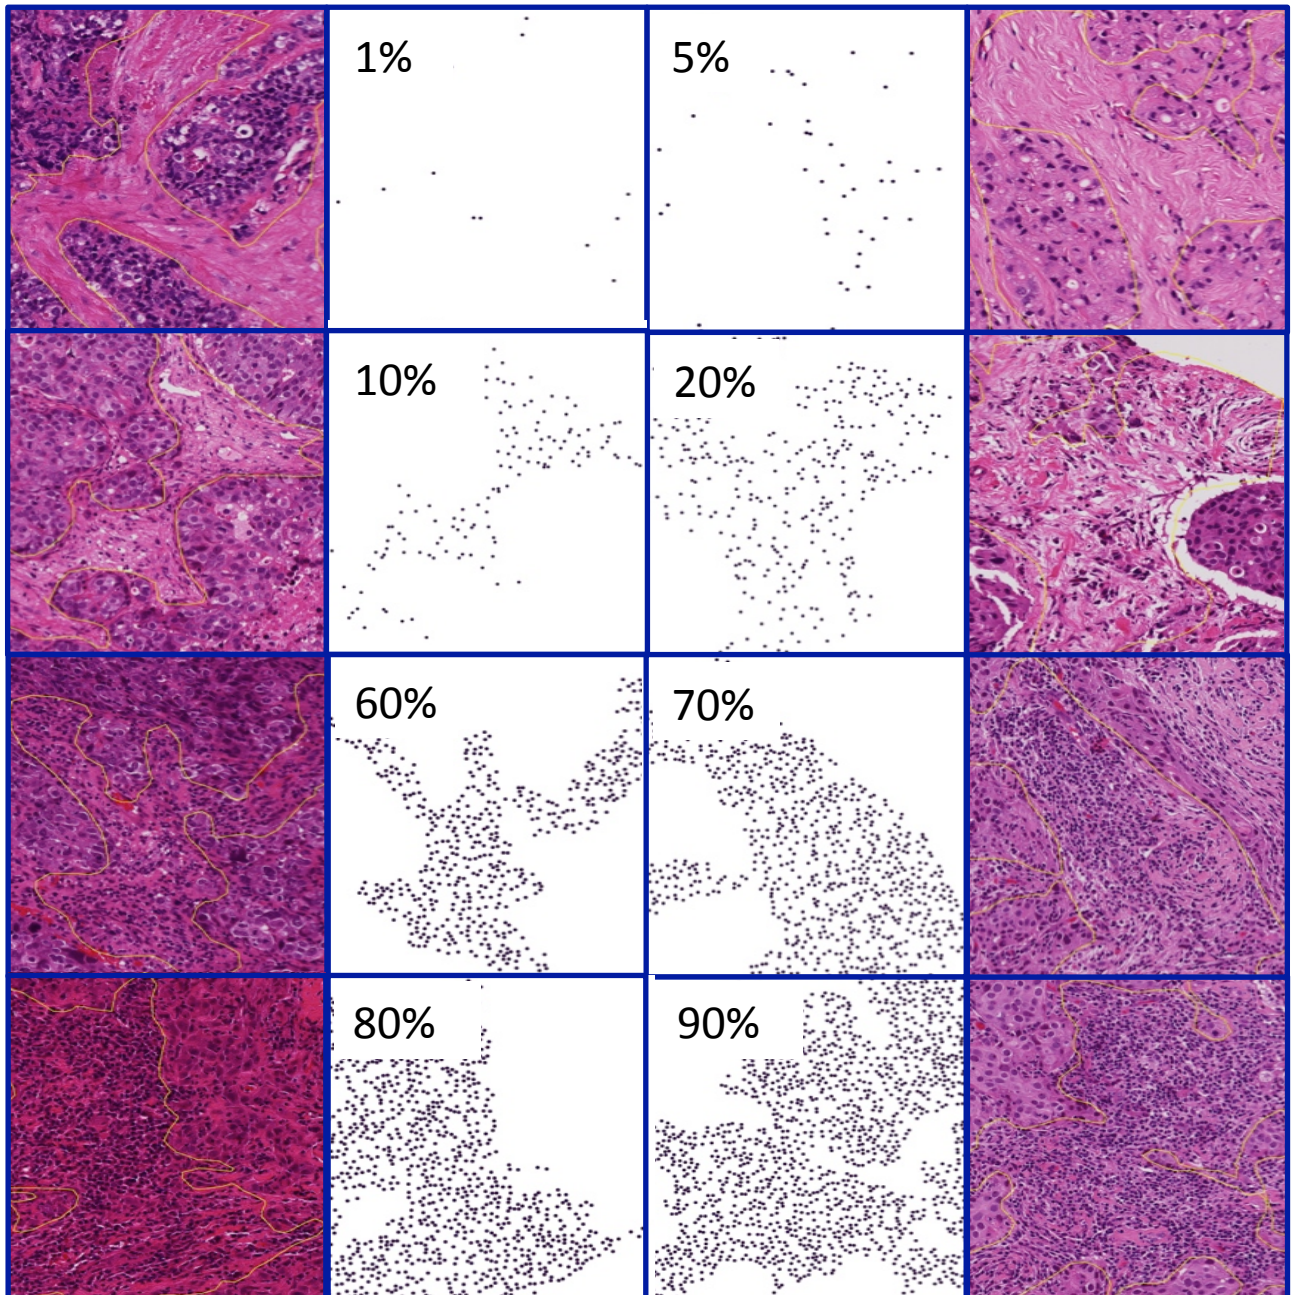

Supplement: NIHMS883271-supplement-Supplementary_File_2.pdf [file NIHMS883271-supplement-Supplementary_File_2.pdf]
