# Supplementary material
Source: PubMed Central journal article supplement (PMC5564448)

# TILs in Ductal Carcinoma in Situ: Reference Scoring Sheet

Reproduced from Pruneri et al 2017 with permission from Oxford University Press  
on behalf of the European Society for Medical Oncology.

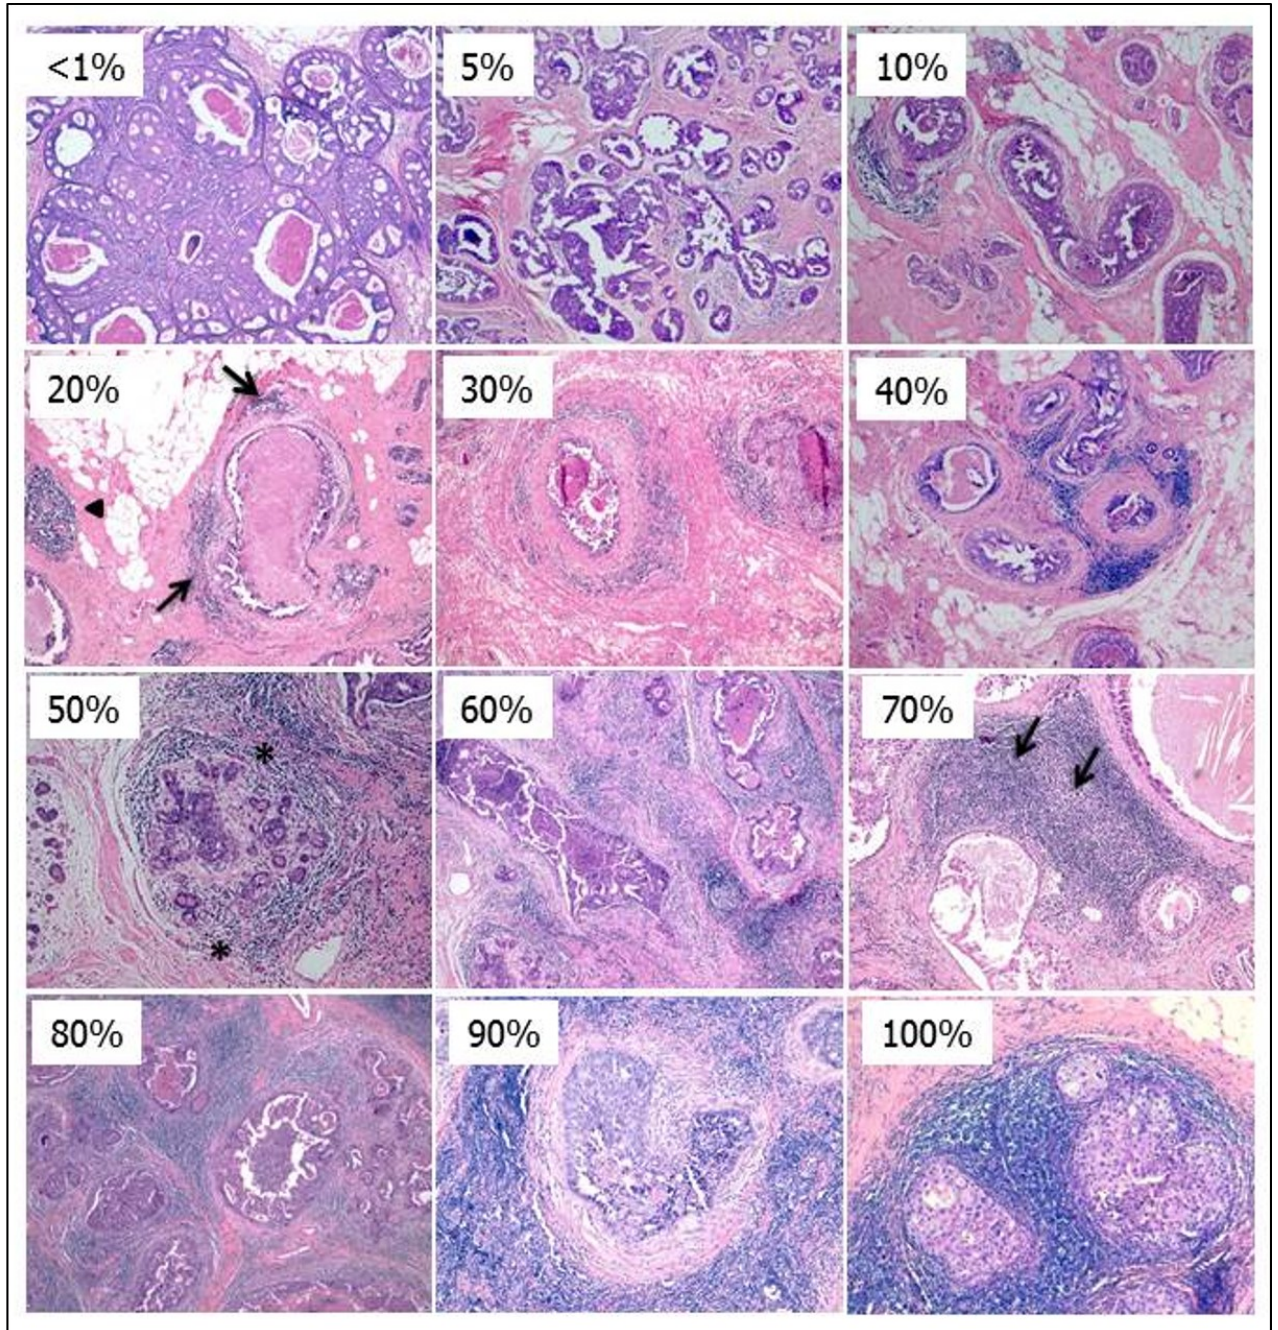

Supplement: NIHMS883271-supplement-Supplementary_File_3.pdf [file NIHMS883271-supplement-Supplementary_File_3.pdf]
